# Supplementary material
Source: PubMed Central journal article supplement (PMC7272283)

Supplemental Table 1: Relative Odds of Clavien Grade 3/4 Complication: Univariable and Multivariable Logistic Regression Models, Odds Ratios (95% CI)

|                                                                                 | Univariable              | P value      | Overall P value | Multivariable             | P value      | Overall P value |
|---------------------------------------------------------------------------------|--------------------------|--------------|-----------------|---------------------------|--------------|-----------------|
| SED (reference: Low SED)                                                        |                          |              | 0.416           |                           |              | 0.657           |
| Moderate SED                                                                    | 1.48 (0.70, 3.14)        | 0.306        |                 | 1.13 (0.48, 2.72)         | 0.777        |                 |
| High SED                                                                        | 0.86 (0.33, 2.11)        | 0.753        |                 | 0.70 (0.23, 1.97)         | 0.511        |                 |
| Age                                                                             | 1.00 (0.96, 1.03)        | 0.858        |                 | 0.99 (0.94, 1.04)         | 0.620        |                 |
| Male sex (reference: female)                                                    | <b>0.48 (0.24, 0.93)</b> | <b>0.031</b> |                 | 0.54 (0.25, 1.15)         | 0.111        |                 |
| Race (reference: White)                                                         |                          |              | 0.109           |                           |              | 0.109           |
| Black                                                                           | 2.03 (0.44, 7.03)        | 0.300        |                 | 2.76 (0.48, 12.64)        | 0.213        |                 |
| Other / unknown                                                                 | 3.38 (0.87, 11.37)       | 0.057        |                 | 3.49 (0.69, 16.02)        | 0.112        |                 |
| Insurance (reference: private)                                                  |                          |              | 0.920           |                           |              | 0.828           |
| Government with private supplement                                              | 0.91 (0.42, 2.03)        | 0.822        |                 | 0.80 (0.29, 2.24)         | 0.660        |                 |
| Government                                                                      | 0.84 (0.35, 1.99)        | 0.683        |                 | 0.71 (0.24, 2.14)         | 0.542        |                 |
| Distance from Moffitt (miles)                                                   | 1.00 (0.99, 1.01)        | 0.660        |                 | 1.00 (0.99, 1.01)         | 0.699        |                 |
| Charlson comorbidity index                                                      | 1.14 (0.91, 1.42)        | 0.266        |                 | 0.97 (0.68, 1.37)         | 0.872        |                 |
| Diabetes mellitus (reference: no)                                               | 1.40 (0.68, 2.80)        | 0.348        |                 | 1.12 (0.45, 2.68)         | 0.806        |                 |
| BMI                                                                             | 1.00 (0.97, 1.02)        | 0.745        |                 | 1.00 (0.97, 1.02)         | 0.967        |                 |
| Preoperative biliary stent (reference: none)                                    | <b>2.25 (1.11, 4.87)</b> | <b>0.031</b> |                 | 2.08 (0.80, 6.10)         | 0.154        |                 |
| Neoadjuvant Therapy (reference: none)                                           | 0.84 (0.41, 1.68)        | 0.639        |                 | 0.56 (0.21, 1.40)         | 0.226        |                 |
| ASA class 3 (reference: ASA 2)                                                  | <b>2.21 (1.09, 4.79)</b> | <b>0.030</b> |                 | <b>3.52 (1.36, 10.05)</b> | <b>0.013</b> |                 |
| Distal pancreatectomy +/- splenectomy (reference: Whipple/total pancreatectomy) | 0.36 (0.11, 0.95)        | 0.064        |                 | 0.78 (0.16, 3.59)         | 0.747        |                 |
| Venous reconstruction (reference: none)                                         | 1.25 (0.44, 3.03)        | 0.649        |                 | 0.94 (0.26, 3.03)         | 0.926        |                 |
| Estimated blood loss                                                            | <b>1.00 (1.00, 1.00)</b> | <b>0.035</b> |                 | 1.00 (1.00, 1.00)         | 0.126        |                 |
| Operative time                                                                  | <b>1.24 (1.08, 1.43)</b> | <b>0.002</b> |                 | 1.18 (0.99, 1.42)         | 0.067        |                 |
| Pathologic tumor stage (reference: CR/in situ)                                  |                          |              | 0.876           |                           |              | 0.949           |
| T1                                                                              | 1.36 (0.20, 11.15)       | 0.752        |                 | 0.69 (0.08, 7.67)         | 0.743        |                 |
| T2                                                                              | 1.53 (0.40, 10.08)       | 0.587        |                 | 1.10 (0.20, 9.67)         | 0.922        |                 |
| T3                                                                              | 1.79 (0.46, 11.91)       | 0.459        |                 | 0.97 (0.18, 8.64)         | 0.976        |                 |
| Pathologic nodal stage (reference: N0)                                          |                          |              | 0.767           |                           |              | 0.871           |
| N1                                                                              | 1.28 (0.62, 2.68)        | 0.506        |                 | 1.14 (0.46, 2.85)         | 0.776        |                 |
| N2                                                                              | 1.00 (0.36, 2.50)        | 0.993        |                 | 0.86 (0.26, 2.67)         | 0.794        |                 |
| R1 Margin status (reference: R0)                                                | 1.60 (0.56, 3.97)        | 0.339        |                 | 1.27 (0.35, 4.08)         | 0.701        |                 |



**Supplemental Figure 1. Representative image of the MCC standardized clinical pathway for PDAC**

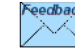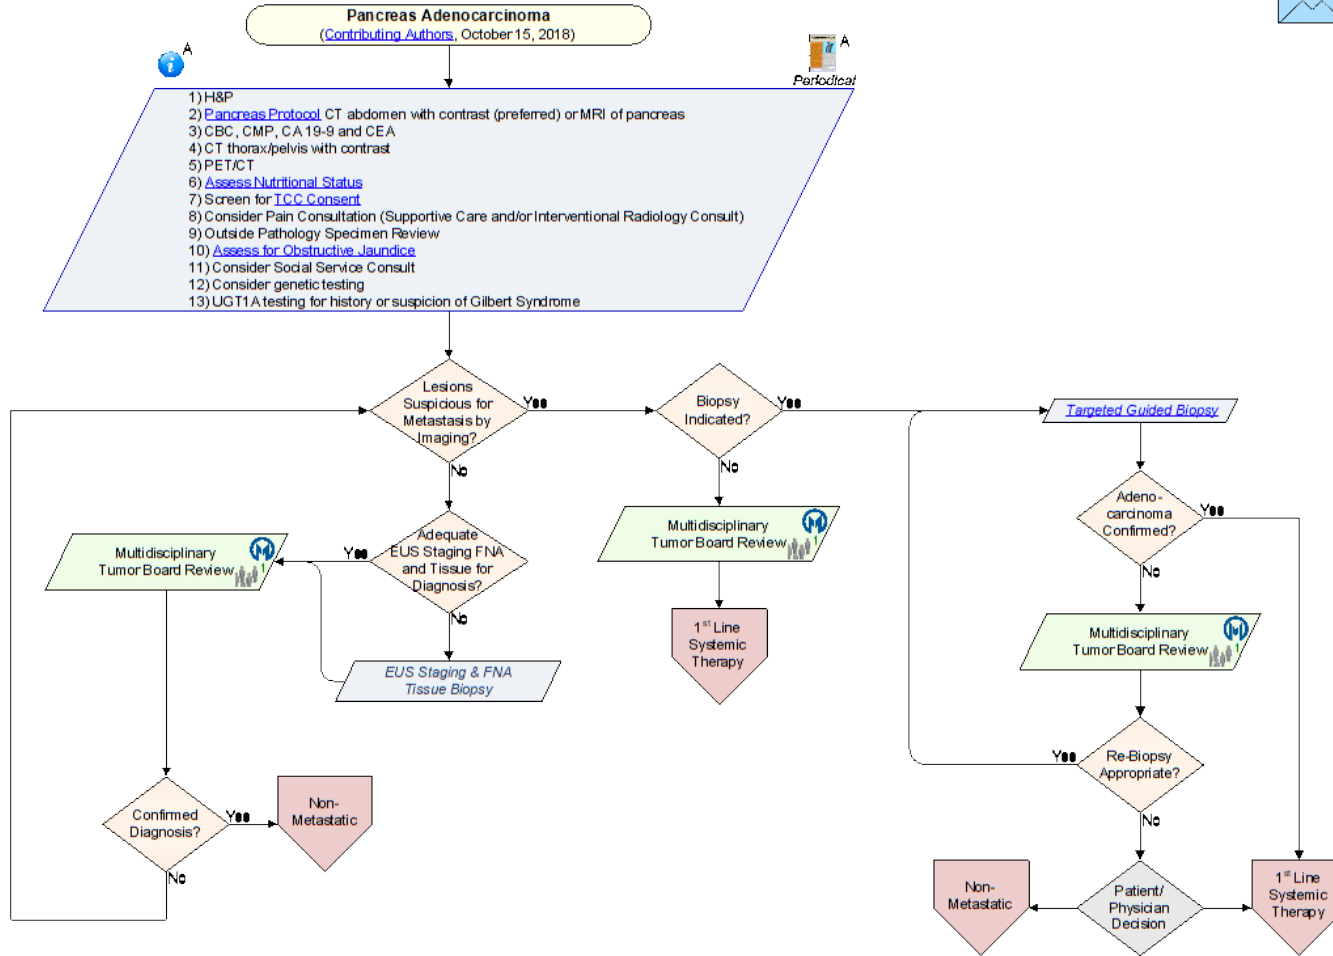

Supplement: NIHMS1575601-supplement-Supplementary_Material.pdf [file NIHMS1575601-supplement-Supplementary_Material.pdf]
